# Supplementary material for: Expression Analysis of a Novel Oxidoreductase Glutaredoxin 2 in Black Tiger Shrimp, Penaeus monodon
Source: MDPI journal article supplement (doi:10.3390/antiox11101857), 2022-09-20
Supplement: s1 [file s1]

# Supplementary materials-Table

**Table S1.** Primers used in cDNA cloning.

| Forward primer 5'-3' sequences | Reverse primer 5'-3' sequences | Purpose                       |
|--------------------------------|--------------------------------|-------------------------------|
| GCTGCTGTCATCTCATGGTGTTC        | TCCTTCCTTGTAGAGTTGCCTCGT       | <i>PmGrx2</i> -ORF Validation |
| ATGAAGGGCCCAGTTGCT             | CTGAACCAAATTTGCTAATTTTC        |                               |
| GCATAGGTGGAGGAACAG             | CTAACAACTGAGGTAGGTAGAA         |                               |

**Table S2.** Primers used in RACE.

| Primer Name           | 5'-3' sequences                               |
|-----------------------|-----------------------------------------------|
| UPM Long primer       | CTAATACGACTCACTATAGGGCAAGCAGTGGTATCAACGCAGAGT |
| UPM Short primer      | CTAATACGACTCACTATAGGGC                        |
| NUP                   | AAGCAGTGGTATCAACGCAGAGT                       |
| <i>PmGrx2</i> -3' GSP | TGATAAGCAGCCTGATGGTG                          |
| <i>PmGrx2</i> -5' GSP | CTAACAACTGAGGTAGGTAGA                         |

**Table S3.** Primers used in qRT-PCR experiments.

| Forward primer 5'-3' sequences | Reverse primer 5'-3' sequences | Purpose                        |
|--------------------------------|--------------------------------|--------------------------------|
| AAGCCAGGTATGGTTGTCAACTTT       | CGTGGTGCATCTCCACAGACT          | <i>PmEF-1α</i> qRT-PCR primers |
| TGATAAGCAGCCTGATGGTG           | GCCTCGTTTCTGTTCCTCCA           | <i>PmGrx2</i> qRT-PCR primers  |
| TCCTCCGTCCTTCGTGTCTCTTCCT      | ACCAGGTGGCGTAGAAGTCGATGAC      | <i>PmTrx</i> qRT-PCR primers   |
| TACCCTTTGGATTTACCTTTGTC        | ATTGATTGTTACCTGACGGAGATT       | <i>PmPrx1</i> qRT-PCR primers  |
| CGAGGATTTGCTGTGAAGTTTT         | ATGAAGGAAGGGAATAGAATAGGAT      | <i>PmCAT</i> qRT-PCR primers   |
| GGTGACATCGAGAAGGGCAAGAAGA      | CCTTGGACTTGTGGCGTCTGTGTA       | <i>PmCYC</i> qRT-PCR primers   |
| ATGGAGCCCTGTATTGAG             | GTGGATGGAGAACTGGAA             | <i>PmIAP</i> qRT-PCR primers   |

**Table S4.** Primers used in dsRNA synthesis.

| Forward primer 5'-3' sequences | Reverse primer 5'-3' sequences | Purpose                 |
|--------------------------------|--------------------------------|-------------------------|
| ATGGTGAGCAAGGGCGAGGAG          | TCAAAGATCTACCATGTACAGCTCGT     | dsGFP Synthesis         |
| TAATACGACTCACTATAGGATGGTGAGC   | TAATACGACTCACTATAGGTCAAAGATCT  | dsGFP Synthesis (T7)    |
| AAGGGCGAGGAG                   | ACCATGTACAGCTCGT               |                         |
| AGGCTCATCGAGTTGTCAAATTGC       | TCCTTCCTTGTAGAGTTGCCTCGT       | dsPmGrx2 Synthesis      |
| TAATACGACTCACTATAGGAGGCTCATC   | TAATACGACTCACTATAGGTCCTTCCTTGT | dsPmGrx2 Synthesis (T7) |
| GAGTTGTCAAATTGC                | AGAGTTGCCTCGT                  |                         |

**Table S5.** Primers used in exons amplification of *PmGrx2*.

| Forward primer 5'-3' sequences | Reverse primer 5'-3' sequences | Purpose                              |
|--------------------------------|--------------------------------|--------------------------------------|
| TGAAAATGCCCCAATAGTT            | ATACTCTTACCTTTTATAGCTATCTT     | Exon1 amplification of <i>PmGrx2</i> |
| TGATTGTGTACACTGACAGGCAT        | AAGGCTACACCTGTTCCCTG           | Exon2 amplification of <i>PmGrx2</i> |
| ACCTTGTTTCCCCAGTGAT            | AGTTACACCCTTTTCTACTATTTT       | Exon3 amplification of <i>PmGrx2</i> |
| AAACTGAAATAACATTCCATTG         | AAGGATTACTTTACATGATTACAC       | Exon4 amplification of <i>PmGrx2</i> |

**Table S6.** Accession numbers were used the alignment and phylogenic tree in this study.

| Accession number | Scientific name               |
|------------------|-------------------------------|
| KQK78544.1       | <i>Amazona aestiva</i>        |
| AK341132.1       | <i>Acyrtosiphon pisum</i>     |
| ADY47130.1       | <i>Ascaris suum</i>           |
| PSN36174.1       | <i>Blattella germanica</i>    |
| NP_001030273.1   | <i>Bos taurus</i>             |
| XP_026053840.1   | <i>Carassius auratus</i>      |
| XP_026078075.1   | <i>Carassius auratus</i>      |
| XP_005690513.1   | <i>Capra hircus</i>           |
| KAG0717517.1     | <i>Chionoecetes opilio</i>    |
| AEL23128.1       | <i>Cherax quadricarinatus</i> |
| WP_190627512.1   | <i>Cyanobacteria</i>          |
| NP_001005950.1   | <i>Danio rerio</i>            |
| NP_001002404.1   | <i>Danio rerio</i>            |
| BC059659.1       | <i>Danio rerio</i>            |
| OAF97418.1       | <i>Escherichia coli</i>       |
| SYX47894.1       | <i>Escherichia coli</i>       |
| AXM05418.1       | <i>Eriocheir sinensis</i>     |
| XP_422200.3      | <i>Gallus gallus</i>          |
| AJ720261.1       | <i>Gallus gallus</i>          |
| XP_042205294.1   | <i>Homarus americanus</i>     |
| XP_042230596.1   | <i>Homarus americanus</i>     |
| KAA0195653.1     | <i>Hyalomma azteca</i>        |
| AAH05289.1       | <i>Homo sapiens</i>           |
| AAH28113.1       | <i>Homo sapiens</i>           |
| AB223038.1       | <i>Homo sapiens</i>           |
| XP_013786644.1   | <i>Limulus polyphemus</i>     |
| XP_010713979.1   | <i>Meleagris gallopavo</i>    |
| NP_001253327.1   | <i>Macaca mulatta</i>         |
| NP_001033681.1   | <i>Mus musculus</i>           |
| NP_075629.2      | <i>Mus musculus</i>           |
| AK013761.1       | <i>Mus musculus</i>           |
| AES71315.2       | <i>Medicago truncatula</i>    |
| KAG8003369.1     | <i>Nibea albigera</i>         |
| EZA62809.1       | <i>Ooceraea biro</i>          |
| XP_008266946.1   | <i>Oryctolagus cuniculus</i>  |

|                |                                 |
|----------------|---------------------------------|
| BT073697.1     | <i>Oncorhynchus mykiss</i>      |
| XP_043941258.1 | <i>Protopterus annectens</i>    |
| MZ827442       | <i>Penaeus monodon</i>          |
| XP_042879398.1 | <i>Penaeus japonicus</i>        |
| XP_042868605.1 | <i>Penaeus japonicus</i>        |
| XP_041125683.1 | <i>Polyodon spathula</i>        |
| XP_042832948.1 | <i>Panthera tigris</i>          |
| XP_045130901.1 | <i>Portunus trituberculatus</i> |
| MPC08028.1     | <i>Portunus trituberculatus</i> |
| XP_027229698.1 | <i>Penaeus vannamei</i>         |
| XP_027209771.1 | <i>Penaeus vannamei</i>         |
| XP_027214062.1 | <i>Penaeus vannamei</i>         |
| XM_027358261.1 | <i>Penaeus vannamei</i>         |
| AAH86381.1     | <i>Rattus norvegicus</i>        |
| GFP69650.1     | <i>Saccharomyces cerevisiae</i> |
| GFP69319.1     | <i>Saccharomyces cerevisiae</i> |
| NM_001183873.1 | <i>Saccharomyces cerevisiae</i> |
| AGS29206.1     | <i>Salmonella enterica</i>      |
| UHY14109.1     | <i>Scylla paramamosain</i>      |
| BT048738.1     | <i>Salmo salar</i>              |
| NP_001230646.1 | <i>Sus scrofa</i>               |
| QCE13504.1     | <i>Vigna unguiculata</i>        |
| NP_001016637.1 | <i>Xenopus tropicalis</i>       |
| BC075374.1     | <i>Xenopus tropicalis</i>       |
| KAG5373225.1   | <i>Yarrowia sp.</i>             |
| NP_001151051.2 | <i>Zea mays</i>                 |

**Table S7.** Homology of *PmGrx2* with Grx2 of other species.

| Species                         | Identity % | Similarity % |
|---------------------------------|------------|--------------|
| <i>Penaeus vannamei</i>         | 96.64      | 98           |
| <i>Penaeus japonicus</i>        | 94.96      | 98           |
| <i>Portunus trituberculatus</i> | 77.97      | 87           |
| <i>Eriocheir sinensis</i>       | 77.88      | 86           |
| <i>Homarus americanus</i>       | 76.32      | 92           |
| <i>Scylla paramamosain</i>      | 75.42      | 88           |

**Table S8.** Names and Websites of the analysis software.

| Software Name       | Software Website                                                                                                                                                |
|---------------------|-----------------------------------------------------------------------------------------------------------------------------------------------------------------|
| ORF finder          | <a href="https://www.ncbi.nlm.nih.gov/orffinder">https://www.ncbi.nlm.nih.gov/orffinder</a>                                                                     |
| BLAST               | <a href="https://blast.ncbi.nlm.nih.gov/Blast.cgi?CMD=Web&amp;PAGE_TYPE=BlastHome">https://blast.ncbi.nlm.nih.gov/Blast.cgi?CMD=Web&amp;PAGE_TYPE=BlastHome</a> |
| SMART               | <a href="http://smart.embl-heidelberg.de/">http://smart.embl-heidelberg.de/</a>                                                                                 |
| SignalP-5.0 Server  | <a href="http://www.cbs.dtu.dk/services/SignalP/">http://www.cbs.dtu.dk/services/SignalP/</a>                                                                   |
| YinOYang 1.2 Server | <a href="http://www.cbs.dtu.dk/services/YinOYang/">http://www.cbs.dtu.dk/services/YinOYang/</a>                                                                 |
| NetNGlyc 1.0 Server | <a href="http://www.cbs.dtu.dk/services/NetNGlyc/">http://www.cbs.dtu.dk/services/NetNGlyc/</a>                                                                 |

---

|                    |                                                                                                                                                                           |
|--------------------|---------------------------------------------------------------------------------------------------------------------------------------------------------------------------|
| NetPhos 3.1 Server | <a href="http://www.cbs.dtu.dk/services/NetPhos/">http://www.cbs.dtu.dk/services/NetPhos/</a>                                                                             |
| Motif Scan         | <a href="https://myhits.sib.swiss/cgi-bin/motif_scan">https://myhits.sib.swiss/cgi-bin/motif_scan</a>                                                                     |
| SOPMA              | <a href="https://npsa-prabi.ibcp.fr/cgi-bin/npsa_automat.pl?page=/NPSA/npsa_sopma.html">https://npsa-prabi.ibcp.fr/cgi-bin/npsa_automat.pl?page=/NPSA/npsa_sopma.html</a> |
| ConSurf            | <a href="https://consurf.tau.ac.il/overview.php">https://consurf.tau.ac.il/overview.php</a>                                                                               |
| Expasy             | <a href="https://web.expasy.org/compute_pi/">https://web.expasy.org/compute_pi/</a>                                                                                       |
| NCBI               | <a href="https://www.ncbi.nlm.nih.gov/">https://www.ncbi.nlm.nih.gov/</a>                                                                                                 |
| STRING             | <a href="https://cn.string-db.org/">https://cn.string-db.org/</a>                                                                                                         |

---
